# Supplementary material for: Lung Cancer Screening Policy in Alaska and Occupational Therapy
Source: Oxford University Press journal article supplement (doi:10.5014/ajot.2021.048231), 2021-04-14
Supplement: 7503090010p1_ds001.docx [file 7503090010p1_ds001.docx]

Aberle, D. R., Adams, A. M., Berg, C. D., Black, W. C., Clapp, J. D., Fagerstrom, R. M.,….Sicks, J. D. (2011). Reduced lung-cancer mortality with low-dose computed tomographic screening. *The New England Journal of Medicine, 365*(5), 395-409. doi:10.1056/NEJMoa1102873

Amalraj, S., Starkweather, C., Nguyen, C., & Naeim, A. (2009). Health literacy, communication, and treatment decision‐making in older cancer patients. *Oncology (Williston Park), 23*(4), 369–375.

American Occupational Therapy Association. (2014). Occupational therapy practice framework: Domain and process (3rd ed.). *American Journal of Occupational Therapy, 68*(Suppl. 1), S1-S48.

Andreano, A., Peake, M. D., Janes, S. M., Valsecchi, M. G., Pritchard-Jones, K., Hoag, J. R., & Gross, C. P. (2018). The care and outcomes of older persons with lung cancer in England and the United States, 2008–2012. *Journal of Thoracic Oncology, 13*(7), 904 914. doi: 10.1016/j.jtho.2018.04.022

Arndt, B. G., Beasley, J. W., Watkinson, M. D., Temte, J. L., Tuan, W-J., Sinsky, C. A., & Gilchrist, V. J. (2017). Tethered to the EHR: Primary care physician workload assessment using EHR event log data and time-motion observations. *Annals of Family Medicine, 15*, 419-426. doi: 10.1370/afm.2121.

Bach, P. B., Mirkin, J. N., Oliver, T. K., Azzoli, C. G., Berry, D. A., Brawley, O. W., . . . Detterbeck, F. C. (2012). Benefits and harms of CT screening for lung cancer: A systematic review. *Journal of the American Medical Association, 307*(22), 2418-2429. doi: 10.1001/jama.2012.5521

Barnes, A. J., Groskaufmanis, L., & Thomson, N. B. (2016). Promising approaches from behavioral economics to improve patient lung cancer screening decisions. *Journal of American College of Radiology, 13*, 1566-1570.

Berwick, D. M., Nolan, T. W., & Whittington, J. (2008). The triple aim: Care, health, and cost.*Health Affairs (Project Hope), 27*(3), 759. doi: 10.1377/hlthaff.27.3.759

Brenner, A., Malo, T., Margolis, M., Lafata, J.E., James, S., Vu, M. B., & Reuland, D.S. (2018). Evaluating shared decision making for lung cancer screening. *JAMA Internal Medicine*, E1-E6. doi: 10.1001/jamainternmed.2018.3054

Butala, N. M., Hidrue, M. K., Swersey, A. J., Singh, J. P., Weilburg, J. B., Ferris, T. G., Armstrong, K. A., & Wasfy, J. H. (2019). Measuring individual physician clinical productivity in an era of consolidated group practices. *Healthcare, 7*(4). doi: 10.1016/j.hjdsi.2019.02.001

Cancer facts and figures. (2019). Retrieved from https://www.cancer.org/content/dam/cancer- org/research/cancer-facts-and-statistics/annual-cancer-facts-and-figures/2019/cancer- facts-and-figures-2019.pdf

Center for Medicare and Medicaid Services. (2020).

Chamberlain, E., Truman, J., Scallan, S., Pike, A., & Lyon-Maris, J. (2019). Occupational therapy in primary care: exploring the role of occupational therapy from a primary care perspective. *British Journal of General Practice, 69*(688), 575-576. doi: 10.3399/bjgp19X706517

Depue, J. D., Goldstein, M. G., Redding, C. A., Velicer, W. F., Sun, X., Fava, J., Kazura, A., Rakowski, W. (2008). Cancer prevention in primary care: Predictors of patient counseling across four risk behaviors over 24 months.*Preventive Medicine, 46*(3), 252 259. doi: 10.1016/j.ypmed.2007.11.020

Ersek, J. L., Eberth, J. M., McDonnell, K. K., Strayer, S. M., Sercy, E., Cartmell, K. B., & Friedman, D. B. (2016). Knowledge of, attitudes toward, and use of low-dose computed tomography for lung cancer screening among family physicians. *Cancer, 22*(15), 2324- 2331.  doi: 10.1002/cncr.29944

Fagan, H. B., Fournakis, N. A., Jurkovitz, C., Petrich, A. M., Zhang, Z., Katurakes, N., & Myers, R. E. (2019). Telephone-based shared decision-making for lung cancer screening in primary care. *Journal of Cancer Education*. doi: 10.1007/s13187-019-01528-z

Fleischer, A. & Fleischer, A., II. (2019). Understanding ambulatory care physician OT referral patterns to integrate OT within primary care. *The American Journal of Occupational Therapy, 73*(4). doi: 10.5014/ajot.2019.73S1-PO1037.supp

Hansen, R. P., Olesen, F., Sørensen, H. T., Sokolowski, I., & Søndergaard, J. (2008). Socioeconomic patient characteristics predict delay in cancer diagnosis: A Danish cohort study. *BMC Health Services Research, 8*(1), 49. doi: 10.1186/1472-6963-8-49

Henderson L. M., Jones L. M., Marsh M. W., Brenner A. T., Goldstein A. O., Benefield T. S.,… Reuland, D. S. (2018). Opinions, practice patterns, and perceived barriers to lung cancer screening among attending and resident primary care physicians. *Risk Management and Healthcare Policy, 10*, 189-195.

Humphrys, E., Burt, J., Rubin, G., Emery, J., & Walter, F. (2018). The influence of health literacy on the timely diagnosis of symptomatic cancer: A systemic review. *European Journal of Cancer Care, 28*, e12920-e12929. doi: 10.1111/ecc.12920

Jemal, A., & Fedewa, S. A. (2017). Lung cancer screening with low-dose computed tomography in the United States—2010 to 2015. *JAMA Oncology Pages, 3*(9), 1278- 1281. doi: 10.1001/jamaoncol.2016.6416

Johnson, D. H., Schiller, J. H., Bunn, P. A. (2014). Recent clinical advances in lung cancer management. *Journal of Clinical Oncology, 32*(10), 973-982. doi: 10.1200/JCO.2013.53.1228

Kanodra, N. M., Pope, C., Halbert, C. H., Silvestri, G. A., Rice, L., & Tanner, N. T. (2016). Primary care provider and patient perspective on lung cancer screening: A qualitative study. *Annals of the American Thoracic Society, 13*(11), 1977-1982. doi: 10.1513/AnnalsATS.201604-286OC

Kowalski Frank, L. (2020). Lung cancer detection through the patient, provider, and system continuum. [Unpublished doctoral dissertation]. Pacific University.

Lewis, J. A., Petty, W. Jeffrey, Tooze, J. A., Miller, D. P., Chiles, C., Miller, A. A., . . . Weaver, K. E. (2015). Low-Dose CT Lung Cancer Screening Practices and Attitudes among Primary Care Providers at an Academic Medical Center. *Cancer Epidemiology, Biomarkers & Prevention: A Publication of the American Association for Cancer Research, Cosponsored by the American Society of Preventive Oncology, 24*(4), 664-670.

Li, J., Chung, S., Wei, E. K., & Luft, H. S. (2018). New recommendation and coverage of low dose computed tomography for lung cancer screening: Uptake has increased but is still low. *BMC Health Services Research, 18*(1), 525. doi: 10.1186/s12913-018-3338-9

Low-dose CT lung cancer screening FAQ. (2019). Retrieved from https://www.acr.org/Clinical- Resources/Lung-Cancer-Screening-Resources/FAQ

Lung cancer screening coverage. (2019). Retrieved from https://www.lung.org/assets/documents/lung-cancer/lung-cancer-screening-1.pdf

Lung cancer screening registries. (2016). https://www.cms.gov/Medicare/Medicare-General Information/MedicareApprovedFacilitie/Lung-Cancer-Screening-Registries.html Martín-

McDonnell, K. K., Owens, O. L., Hilfinger Messias, D. K., Heiney, S., Friedman, D., Campbell, C., & Webb, L. (2019). Health behavior changes in African American family members facing lung cancer: Tensions and compromises. *European Journal of Oncology Nursing*, 38, 57-64. doi: 10.1016/j.ejon.2018.12.002

Medicaid. (2019). https://www.lung.org/assets/documents/lung-health/lung-cancer-insurance- chart.pdf

Moyer, V.A. (2014). Screening for lung cancer: U.S. preventive services task force recommendation statement. *Annals of Internal Medicine, 160*(5), 330. doi:10.7326/M132771

Pape, S. B. & Muir, S. (2019). Primary Care Occupational Therapy: How Can We Get There? Remaining Challenges in Patient-Centered Medical Homes. *The American Journal of Occupational Therapy, 73*(5), 7305090010. doi: 10.5014/ajot.2019.037200

Pershing, R. S., & Fuchs, R., V. (2013). Restructuring medical education to meet current and future health care needs.*Academic Medicine, 88*(12), 1798-1801. doi: 10.1097/ACM.0000000000000020

Rai, A., Doria-Rose, V. P., Silvestri, G. A., & Yabroff, K. R. (2019). Evaluating lung cancer screening uptake, outcomes, and costs in the United States: Challenges with existing data and recommendations for improvement. *Journal of the National Cancer Institute, 111*(4), 1-8. doi: 10.1093/jnci/djy229.

Raz, D. J., Wu, G. X., Consunji, M., Nelson, R., Sun, C., Erhunmwunsee, L., . . . Kim, J. Y. (2016). Perceptions and utilization of lung cancer screening among primary care physicians. *Journal of Thoracic Oncology, 11*(11), 1856. doi: 10.1016/j.jtho.2016.06.010

Sakoda, L. C., Meyer, M. A., Chawla, N., Sanchez, M. A., Blatchins, M. A., Nayak, S. . . . Minowada, G. (2019). Effectiveness of a patient education class to enhance knowledge about lung cancer screenings: A quality improvement evaluation. *Journal of Cancer Education*. doi: 10.1007/s13187-019-01540-3

Salomaa, E., Sällinen, S., Hiekkanen, H., & Liippo, K. (2005). Delays in the diagnosis and treatment of lung cancer. *Chest, 128*(4), 2282-2288. doi: 10.1378/chest.128.4.2282

Simmons, V. N., Gray, J. E., Schabath, M. B., Wilson, L. E., & Quinn, G. P. (2017). High-risk community and primary care providers knowledge about and barriers to low-dose computed topography lung cancer screening. *Lung Cancer, 106*, 42-49. doi: 10.1016/j.lungcan.2017.01.012

Singh, H., Giardina, T. D., Peterson, L. A., Smith, M. W., Paul, L. W., Dismukes, K., Bhagwath, G., … Thomas, E. J. (2011). Exploring situational awareness in diagnostic errors in primary care. *British Medical Journal: Quality & Safety, 21*(1), 30-38. doi: 10.1136/bmjqs2011000310

Singh, H., Hirani, K., Kadiyala, H., Rudomiotov, O., Davis, T., Khan, M., & Wahls, T. (2010). Characteristics and predictors of missed opportunities in lung cancer diagnosis: An electronic health record–based study*. Journal of Clinical Oncology, 28*(20), 3307-3315. doi: 10.1200/JCO.2009.25.6636

Singh, H., Sethi, S., Raber, M., & Peterson, L. (2007). Errors in cancer diagnosis: Current understanding and future directions. *Journal of Clinical Oncology, 25*(31), 5009-5018.

Sinsky, C., Colligan, L., Li, L., Prgomet, M., Reynolds, S., Goeders, L. … Blike, G. (2016). Allocation of physician time in ambulatory practice: A time and motion study in 4 specialties. *Annals of Internal Medicine, 165*(11), 753-760. doi: 10.7326/M16-0961

Smith, S. M., Campbell, N. C., MacLeod, U., Lee, A. J., Raja, A., Wyke, S., ... Nicolson, M. C. (2009). Factors contributing to the time taken to consult with symptoms of lung cancer: A cross-sectional study. *Thorax, 64*(6), 523–531.

Søndergaard, S. R., Henning Madsen, P., Hilberg, O., Jensen, K. M., Olling, K., &

Steffensen, K. D. (2019). A prospective cohort study of shared decision making in lung cancer diagnostics: Impact of using a patient decision aid. *Patient Education and Counseling, 102*(11), 1961-1968. Doi: 10.1016/j.pec.2019.05.018

Usman Ali, M., Miller, J., Peirson, L., Fitzpatrick-Lewis, D., Kenny, M., Sherifali, D., & Raina, P. (2016). Screening for lung cancer: A systematic review and meta analysis. *Preventive Medicine, 89*, 301-314. doi: 10.1016/j.ypmed.2016.04.015

Wagland, R., Brindle, L., James, E., Moore, M., Esqueda, A. I., & Corner, J. (2017).

Facilitating early diagnosis of lung cancer amongst primary care patients: The views of GPs. *European Journal of Cancer Care, 26*(3), e12704.

Wong, M.C. (2018). Health behavioral models to find reasons for low rates of lung cancer screening by low-dose computed tomography. *JAMA Oncology, 4*(3), 425.

Yarnall, K. S. H., Pollak, K. I., Østbye, T., Krause, K. M., & Michener, J. L. (2003). Primary care: Is there enough time for prevention? *American Journal of Public Health, 93*(4), 635-641. doi: 10.2105/AJPH.93.4.635

Zeliadt, S. B., Hoffman, R. M., Birkby, G., Eberth, J. M., Brenner, A…Flocke, S. A. (2018). Challenges implementing lung cancer screening in federally qualified health centers. *American Journal of Preventive Medicine, 54*(4), 568-575. doi: 10.1016/j.amepre.2018.01.001
